# Supplementary material for: Effect of PEIE and polylysine as interfacial layers on the performance of air-processed organic solar cells under both indoor and 1 sun conditions
Source: Royal Society of Chemistry journal article supplement (doi:10.1039/d3se00242j), 2023-01-01
Supplement: d3se00242j5.pdf [file d3se00242j5.pdf]

## Supplementary Information

### Effect of PEIE and Polylysine as Interfacial Layers on the Performance of Air-Processed Organic Solar Cell under both Indoor and 1-Sun Condition

Hamed Javanbakht Lomeri<sup>a</sup>, Giuseppina Polino, Suresh Podapangi<sup>a</sup>, Thomas M. Brown<sup>a,\*</sup>, Francesca Brunetti<sup>a,\*</sup>

*CHOSE (Centre for Hybrid and Organic Solar Energy), Department of Electronic Engineering, University of Rome Tor Vergata, Via del Politecnico 1, 00133 Roma*

\* Corresponding author

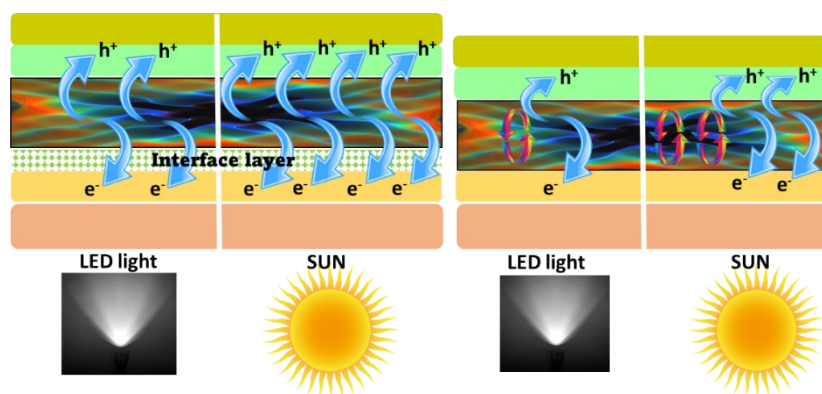

E-mail address: francesca.brunetti@uniroma2.it (Francesca Brunetti)

### Average Photovoltaic Parameters for OPVs with and without Interlayers under 1-Sun Illumination

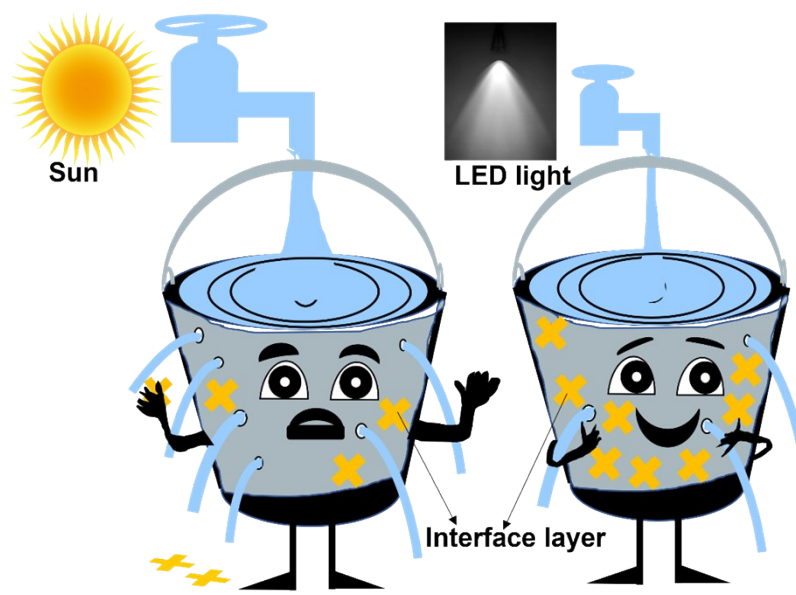

Table S1 The average Photovoltaic Parameters of the studied OPVs with and without interlayers under 1-sun illumination

| Photo Active Layer | Interlayer | $V_{OC}$ (V) | $J_{SC}$ ( $\text{mA}/\text{cm}^2$ ) | FF(%)      | PCE(%)     |
|--------------------|------------|--------------|--------------------------------------|------------|------------|
| PBDB-T-2Cl:IT-4F   | NO IFL     | 0.75±0.01    | 20.43±0.45                           | 66.28±2.42 | 10.55±0.31 |
|                    | PEIE       | 0.79±0.02    | 20.18±0.63                           | 67.54±2.02 | 10.87±0.68 |
|                    | Polylysine | 0.79±0.03    | 21.29±0.85                           | 69.13±3.15 | 11.71±0.76 |
| PM6:Y6             | NO IFL     | 0.74±0.001   | 21.81±1.29                           | 45.64±6.50 | 7.49±1.52  |
|                    | PEIE       | 0.72±0.012   | 23.12±0.43                           | 48.66±1.19 | 8.16±0.88  |
|                    | Polylysine | 0.72±0.009   | 23.49±0.34                           | 48.87±2.81 | 8.36±0.60  |

## Charge Carrier Extraction and Recombination Times Derived from TPC and TPV Decay Curves

Table S2 The charge carrier extraction time and charge carrier recombination time extracted from the TPC and TPV decay curves

| Illumination | Interlayer | Charge extraction time ( $\mu\text{s}$ ) | Charge recombination time ( $\mu\text{s}$ ) |
|--------------|------------|------------------------------------------|---------------------------------------------|
| 1-Sun        | NO IFL     | 6.27                                     | 15.21                                       |
|              | PEIE       | 5.60                                     | 9.43                                        |
|              | Polylysine | 5.34                                     | 17.34                                       |
| 1000 Lx      | NO IFL     | 5.92                                     | 41.79                                       |
|              | PEIE       | 3.63                                     | 98.63                                       |
|              | Polylysine | 5.79                                     | 128.71                                      |

## Average Shunt resistance ( $R_{sh}$ ) and Series resistance ( $R_s$ ) obtained from the J-V curves of the cells

Table S3 Average ( $R_{sh}$ ) and ( $R_s$ ) obtained from the J-V curves of the cells w/o IFLs under standard test conditions (AM1.5G, 100  $\text{mW}/\text{cm}^2$ ).

| Interlayer | Number of Cells | Avg. $R_{sh}$ ( $\text{k}\Omega\text{cm}^2$ ) | Avg. $R_s$ ( $\Omega\text{cm}^2$ ) |
|------------|-----------------|-----------------------------------------------|------------------------------------|
| NO IFL     | 6               | 4.26±2.38                                     | 7.78±3.37                          |
| PEIE       | 6               | 20.60±11.62                                   | 99.90±17.44                        |
| Polylysine | 6               | 5.97±2.61                                     | 91.95±47.26                        |

## Photovoltaic Performance of PBDB-T-2Cl:IT-4F OSCs with and without PEIE and Polylysine IFLs under 1-Sun Illumination

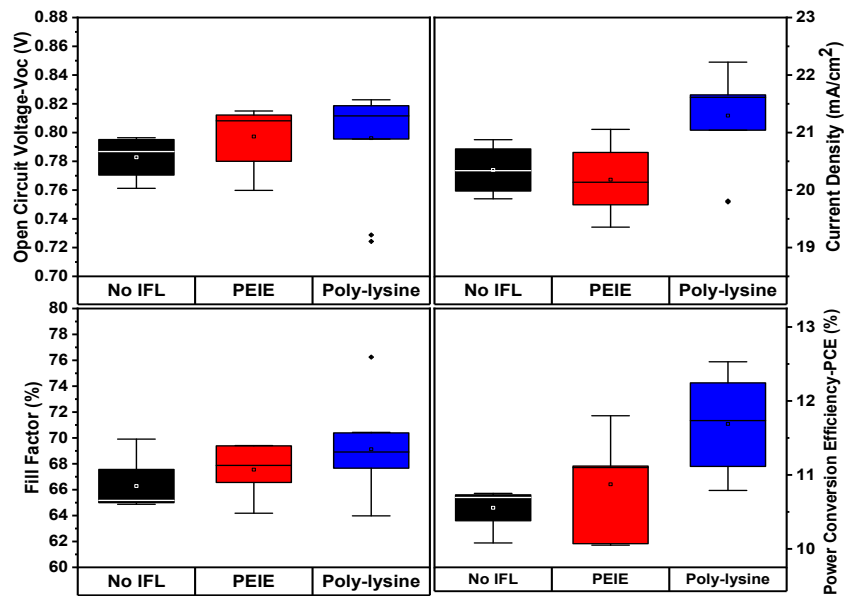

Fig. S1 Photovoltaic parameters of organic solar cells (PBDB-T-2Cl:IT-4F) based devices w/o IFLs (PEIE and Polylysine) under 1-sun illumination

## Photovoltaic Performance of PM6:Y6 OSCs with and without PEIE and Polylysine IFLs under 1-Sun Illumination

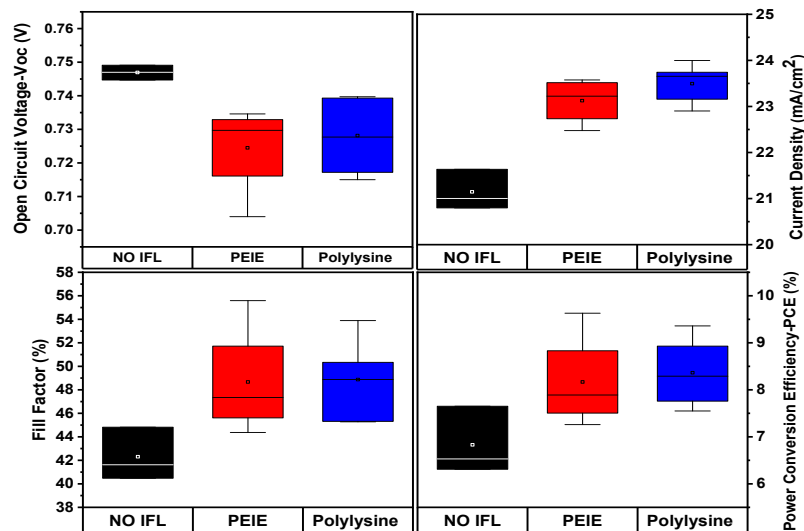

Fig. S2 Photovoltaic parameters of organic solar cells (PM6:Y6) based devices w/o IFLs (PEIE and Polylysine) under 1-sun illumination

## Emission Spectrum of White LED and AM 1.5G Solar simulator

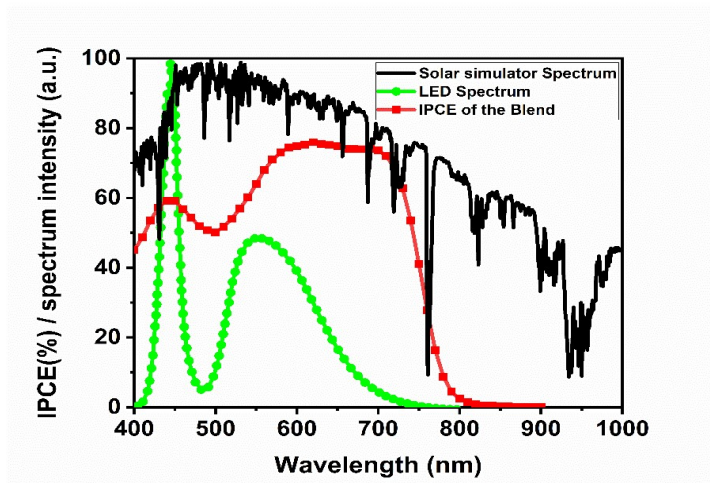

Fig.S3 The emission spectrum of a white LED and, AM 1.5G solar simulator and IPCE of the photo active material used in this

### Schematic figure of Indoor I-V Measurement Setup

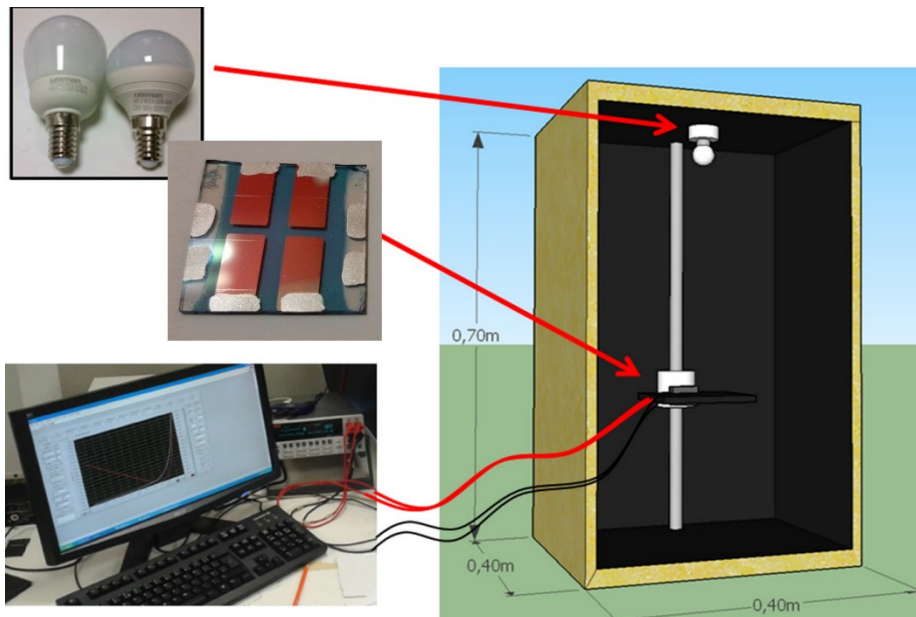

Figure S4 Schematics of the setup for Indoor I-V measurements. Reprinted with permission from Ref [1], copy right 2015, Applied Energy, Elsevier.

### Reference

- [1] F. De Rossi, T. Pontecorvo, and T. M. Brown, "Characterization of photovoltaic devices for indoor light harvesting and customization of flexible dye solar cells to deliver superior efficiency under artificial lighting," *Appl. Energy*, vol. 156, pp. 413–422, 2015, doi: 10.1016/j.apenergy.2015.07.031.
