# Supplementary figures and images for: Effect of PEIE and polylysine as interfacial layers on the performance of air-processed organic solar cells under both indoor and 1 sun conditions
Source: Royal Society of Chemistry journal article supplement (doi:10.1039/d3se00242j), 2023-01-01

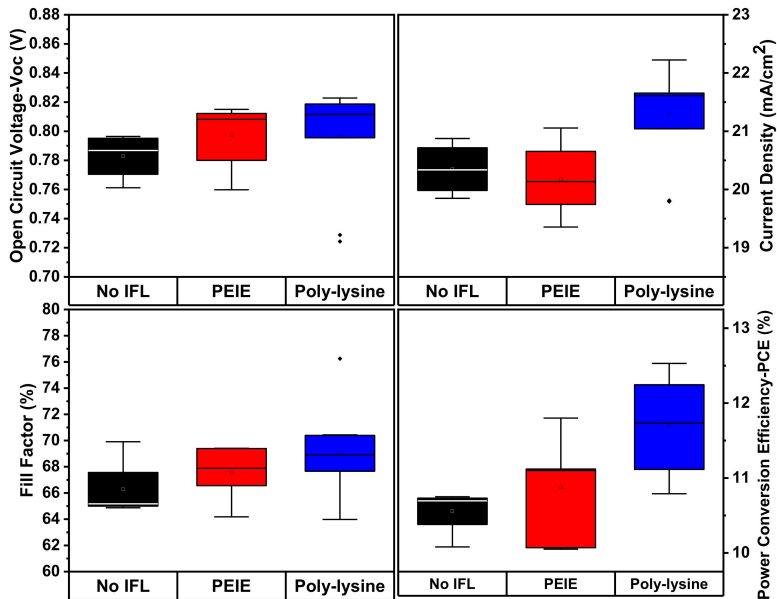

Supplement: d3se00242j1.pdf [file d3se00242j1.pdf]

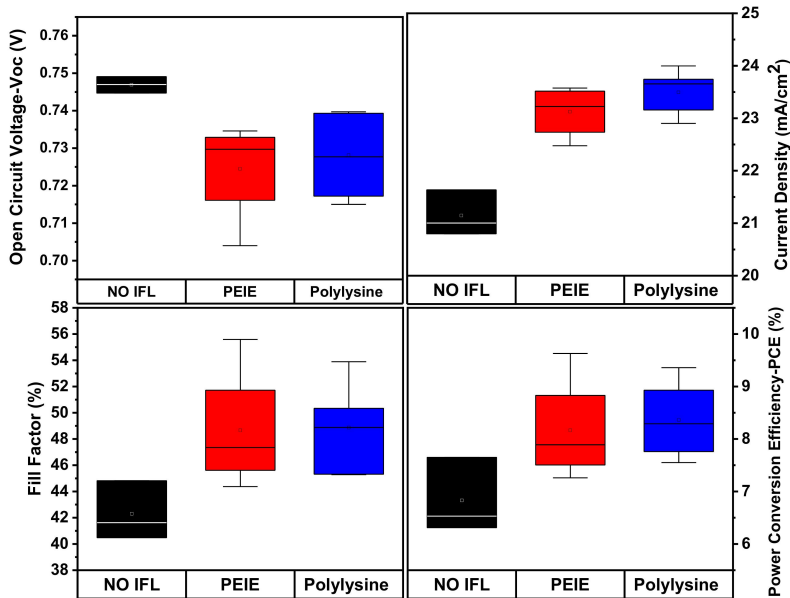

Supplement: d3se00242j2.pdf [file d3se00242j2.pdf]

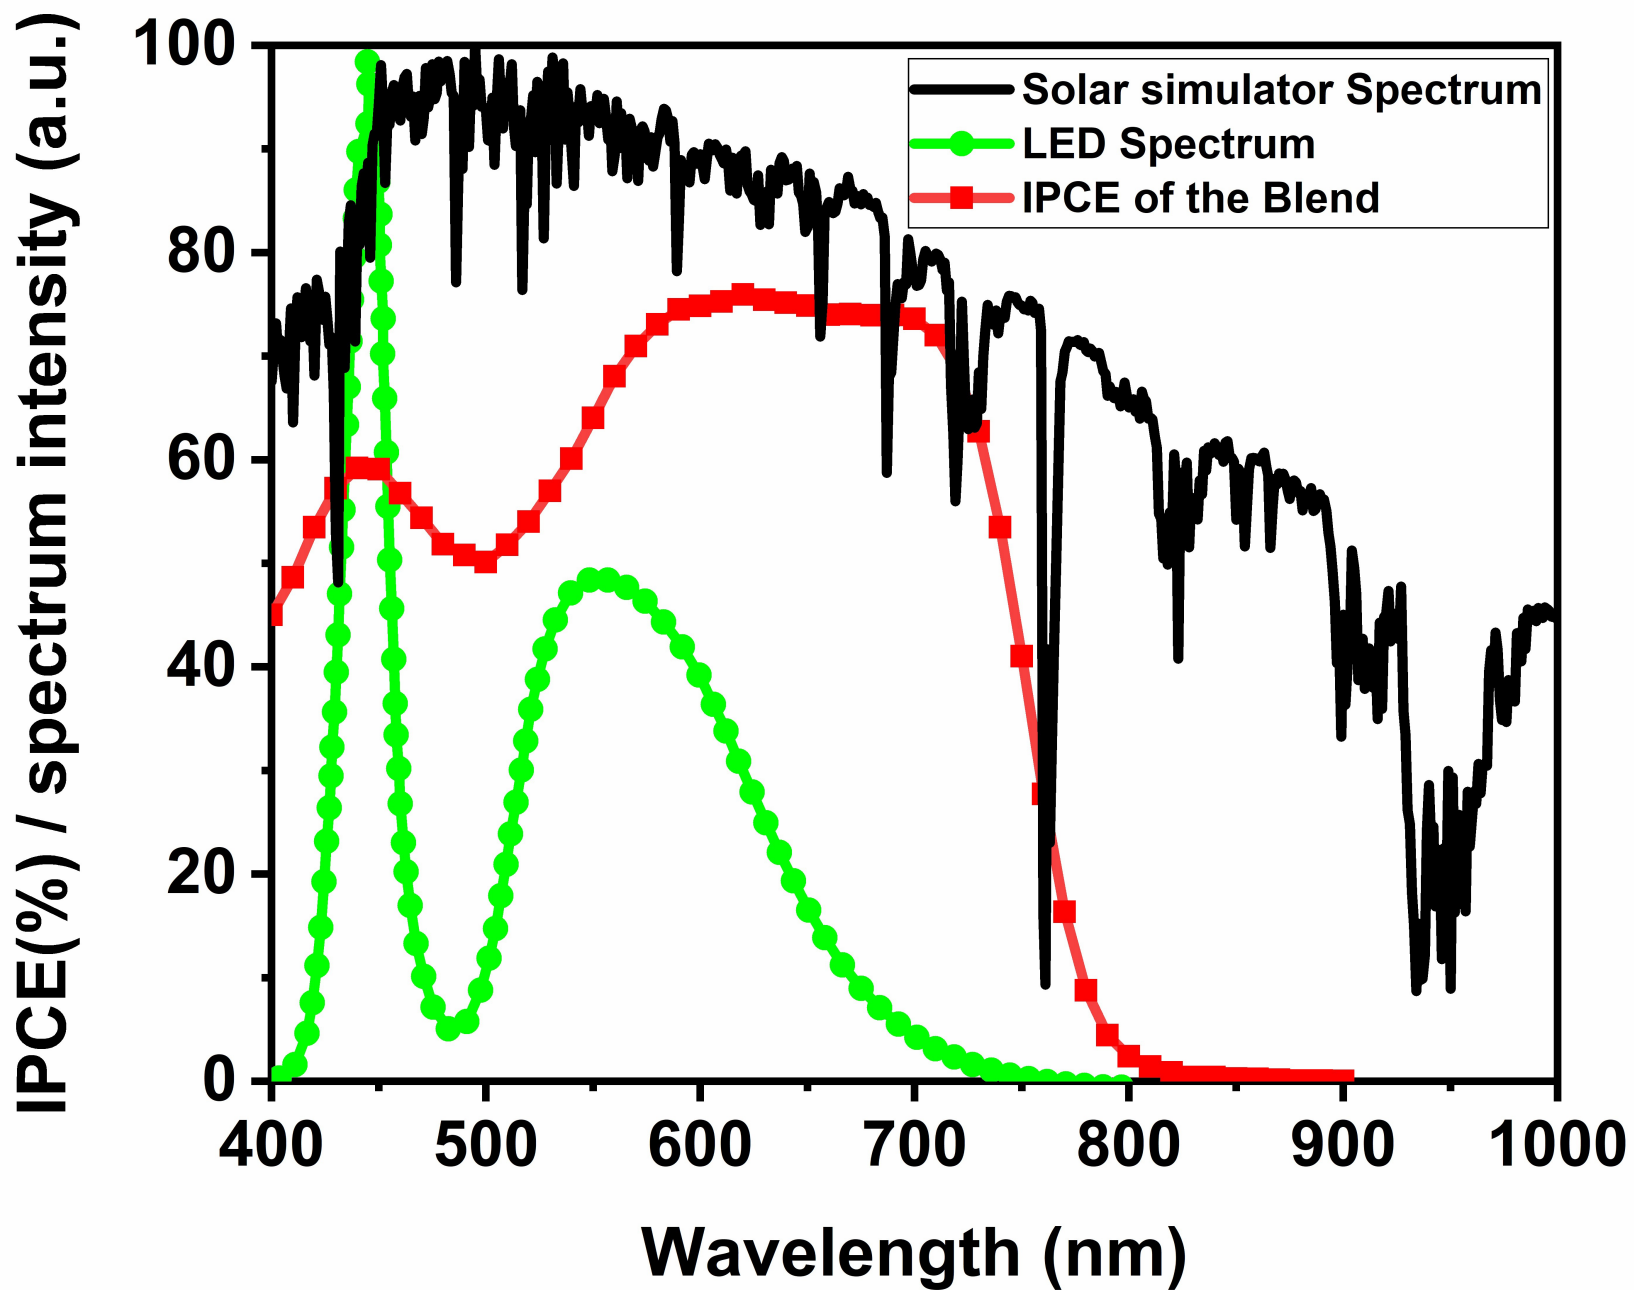

Supplement: d3se00242j3.pdf [file d3se00242j3.pdf]

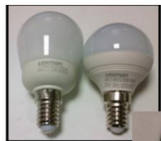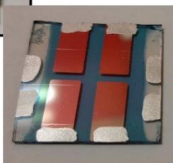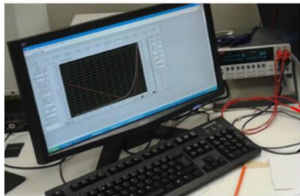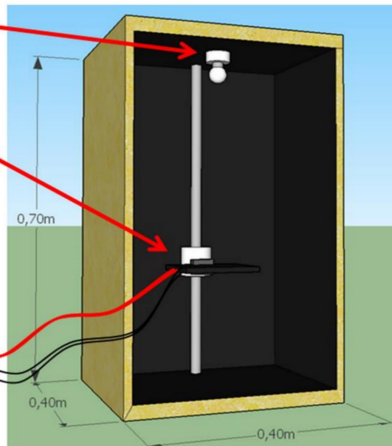

Supplement: d3se00242j4.pdf [file d3se00242j4.pdf]
